# Supplementary material for: Collision-sticking rates of acid–base clusters in the gas phase determined from atomistic simulation and a novel analytical interacting hard-sphere model
Source: Copernicus journal article supplement (doi:10.5194/egusphere-2022-1449), 2023-01-25
Supplement: Supplementary file 1 [file egusphere-2022-1449-supplement.pdf]

Supplementary Materials for

**Collision-sticking rates of acid-base clusters in the gas phase determined from atomistic simulation and a novel analytical interacting hard-sphere model**

Huan Yang<sup>\*1</sup>, Ivo Neefjes<sup>1</sup>, Valtteri Tikkanen<sup>1</sup>, Jakub Kubečka<sup>2</sup>, Theo Kurtén<sup>3</sup>,  
Hanna Vehkamäki<sup>1</sup>, and Bernhard Reischl<sup>1</sup>

<sup>1</sup>Institute for Atmospheric and Earth System Research / Physics, Faculty of Science,  
University of Helsinki, P.O. Box 64, FI-00014, Finland

<sup>2</sup>Department of Chemistry, iClimate, Aarhus University, Langelandsgade 140, 8000 Aarhus C, Denmark

<sup>3</sup>Institute for Atmospheric and Earth System Research / Chemistry, Faculty of Science,  
University of Helsinki, P.O. Box 55, FI-00014, Finland

\*Correspondence: huan.yang@helsinki.fi

## Calculated potential of mean force (PMF) curves for acid-base clusters

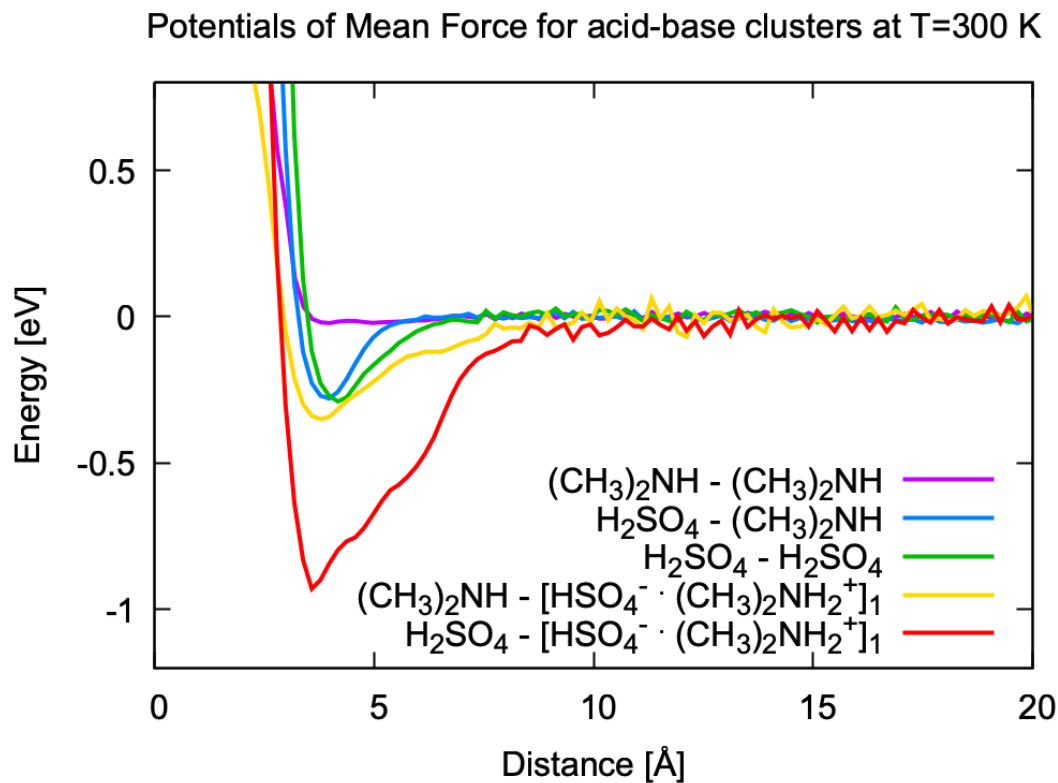

**Figure S1.** Potentials of Mean Force as a function of the center of mass distance between the investigated acid-base “monomers” in the Hamaker approach, obtained from well-tempered metadynamics simulations at T=300 K using an OPLS-AA force field.

### Extracted $\epsilon$ and $\sigma$ values from the calculated PMF curves

**Table S1.** Extracted  $\epsilon$  and  $\sigma$  values

|                  | $(\text{CH}_3)_2\text{NH}$ &<br>$(\text{CH}_3)_2\text{NH}$ | $\text{H}_2\text{SO}_4$ &<br>$\text{H}_2\text{SO}_4$ | $\text{H}_2\text{SO}_4$ &<br>$(\text{CH}_3)_2\text{NH}$ | $\text{H}_2\text{SO}_4$ &<br>$\text{HSO}_4^- \cdot (\text{CH}_3)_2\text{NH}_2^+$ | $(\text{CH}_3)_2\text{NH}$ &<br>$\text{HSO}_4^- \cdot (\text{CH}_3)_2\text{NH}_2^+$ |
|------------------|------------------------------------------------------------|------------------------------------------------------|---------------------------------------------------------|----------------------------------------------------------------------------------|-------------------------------------------------------------------------------------|
| $\epsilon$ [eV]  | ~0                                                         | 0.29                                                 | 0.26                                                    | 0.93                                                                             | 0.35                                                                                |
| $\sigma$ [Å]     | N/A                                                        | 3.71                                                 | 3.54                                                    | 3.19                                                                             | 3.36                                                                                |
| $r_\epsilon$ [Å] | N/A                                                        | 4.17                                                 | 3.97                                                    | 3.58                                                                             | 3.77                                                                                |

Two example cases where the interacting hard-sphere model and the central field approach result in significantly different critical impact parameters

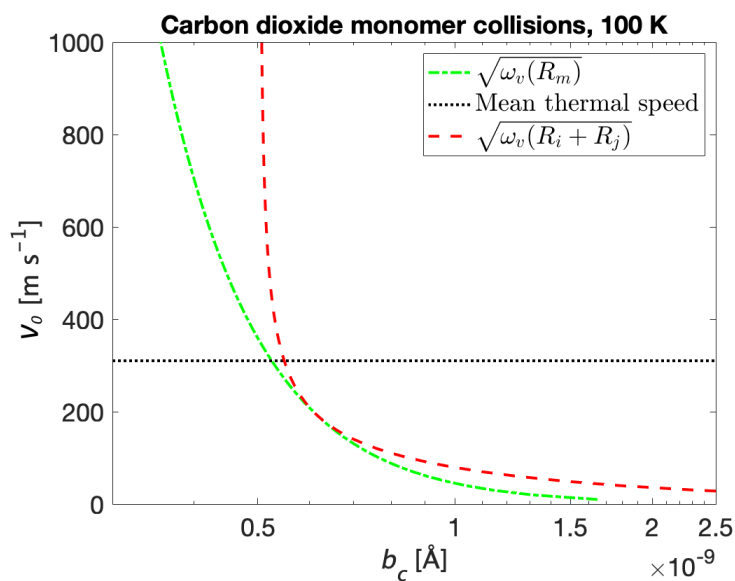

**Figure S2.** Critical impact parameter for collisions of carbon dioxide monomers at 100 K. The Lennard-Jones parameters are  $\epsilon = 0.0108$  eV and  $\sigma = 3.04$  Å [1].

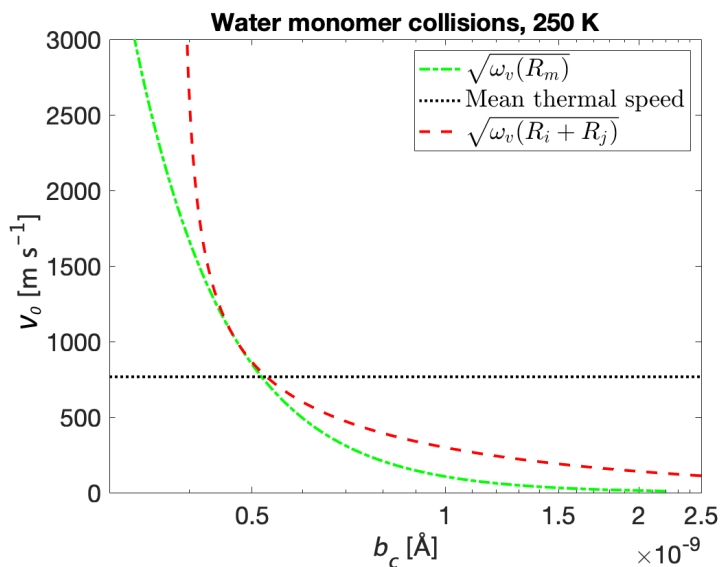

**Figure S3.** Critical impact parameter for collisions of water monomers at 250 K. The Lennard-Jones parameters are  $\epsilon = 0.031$  eV and  $\sigma = 2.928$  Å [2].

## The root of Eq. 14 in the main text

In this part, we provide a reasoning to the statement that Eq. 14 in the main text always has exact one real root that is larger than  $R_c$ , and we shall identify that root. Substitution of Eq. 13 in the main text into  $\omega_v(r)$  yields:

$$\omega_v(r, U_{mc}) = r^2 \left[ 1 + \frac{8n_c \epsilon \sigma^6}{\mu v_0^2} \cdot \frac{1}{(r^2 - R_c^2)^3} \right]. \quad (\text{S1})$$

We take the derivative of Eq. S1 with respect to  $r$  and obtain:

$$\omega_v'(r, U_{mc}) = 2r \left[ 1 - \frac{8n_c \epsilon \sigma^6}{\mu v_0^2} \cdot \frac{2r^2 + R_c^2}{(r^2 - R_c^2)^4} \right] \equiv 2r[1 - \theta f(r)], \quad (\text{S2})$$

where,  $\theta = \frac{8n_c \epsilon \sigma^6}{\mu v_0^2}$  is a positive constant and

$$f(r) = \frac{2r^2 + R_c^2}{(r^2 - R_c^2)^4} = \frac{2}{(r^2 - R_c^2)^3} + \frac{3R_c^2}{(r^2 - R_c^2)^4} \quad (\text{S3})$$

decreases monotonically from  $+\infty$  to 0 as  $r$  increases from  $R_c$  to  $+\infty$ . Therefore,  $\omega_v'(r, U_{mc}) = 0 \Leftrightarrow f(r) = \frac{1}{\theta}$  should have a single root for  $r > R_c$ . Note that  $\omega_v'(r, U_{mc}) = 0$  is equivalent to Eq. 14 in the main text, so now it is safe to say that Eq. 14 has a single real root larger than  $R_c$ . This single real root  $R_m$  should correspond to the maximum of the four roots of the quartic function defined by Eq. 14, which is:

$$R_m^2 = -\frac{a_3}{4a_4} + M + \frac{1}{2} \sqrt{-4M^2 - 2p + \frac{q}{M}}, \quad (\text{S4})$$

where  $p = \frac{8a_4 a_2 - 3a_3^2}{8a_4^2} = 0$ ,  $q = \frac{a_3^3 - 4a_4 a_3 a_2 + 8a_4^2 a_1}{8a_4^3} = -2l_c^6$ ,  $M = \frac{1}{2} \sqrt{-\frac{2}{3}p + \frac{1}{3a_4} \left( N + \frac{\Delta_0}{N} \right)}$ ,

$N = \sqrt[3]{\frac{\Delta_1 + \sqrt{\Delta_1^2 - 4\Delta_0^3}}{2}}$ ,  $\Delta_0 = a_2^2 - 3a_3 a_1 + 12a_4 a_0 = -36R_c^2 l_c^6$ , and  $\Delta_1 = 2a_2^3 - 9a_3 a_2 a_1 +$

$27a_3^2 a_0 + 27a_1^2 a_4 - 72a_4 a_2 a_0 = 108l_c^{12}$  with  $l_c \equiv \left( \frac{8n_c \epsilon \sigma^6}{\mu v_0^2} \right)^{\frac{1}{6}}$ . Substituting the expressions of coefficients  $a_i$  into Eq. S4 and rearranging leads to Eq. 15 in the main text.

## References

- [1] Manos, G., Dunne, L., Jalili, S., Furgani, A., Neville, T.: Monte Carlo Simulation and Exact Statistical Mechanical Lattice Models as a Development Tool for Zeolite Multi-Component Adsorption Isotherm Derivation, *Adsorption Science & Technology* 30, 503-519, 2012.
- [2] Hirschfelder, J. O., Curtiss, C. F., Bird, R. B.: *Molecular theory of gases and liquids*, 1964.
